# Supplementary material for: Overview of Cyanide Poisoning in Cattle from Sorghum halepense and S. bicolor Cultivars in North-West Italy
Source: Preprints.org preprint supplement (doi:10.20944/preprints202402.0315.v1), 2024-02-06
Supplement: Supplementary file 1 [file supplementary]

**Figure S1.** Calibration curve of dhurrin.

**
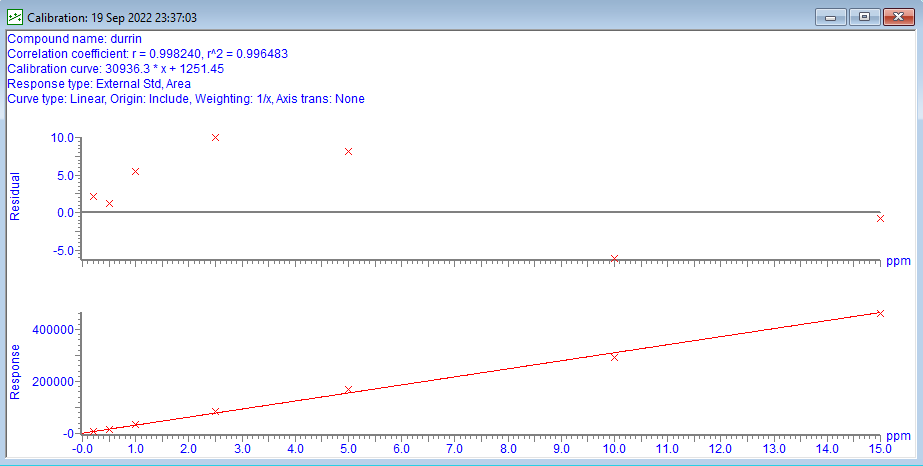
**

**Figure S2.** Representative chromatograms of dhurrin reference material at 2.5 µg/mL.

**
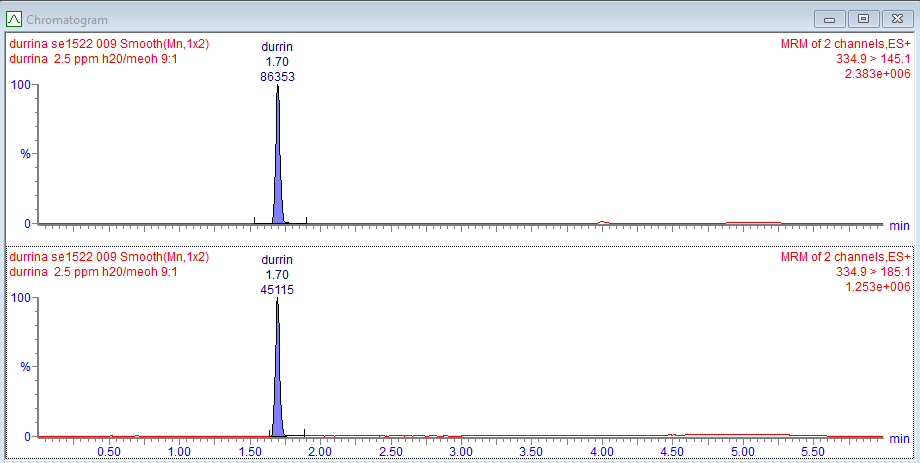
**

**Figure S3.** Representative chromatograms of a Sorghum sample.

**
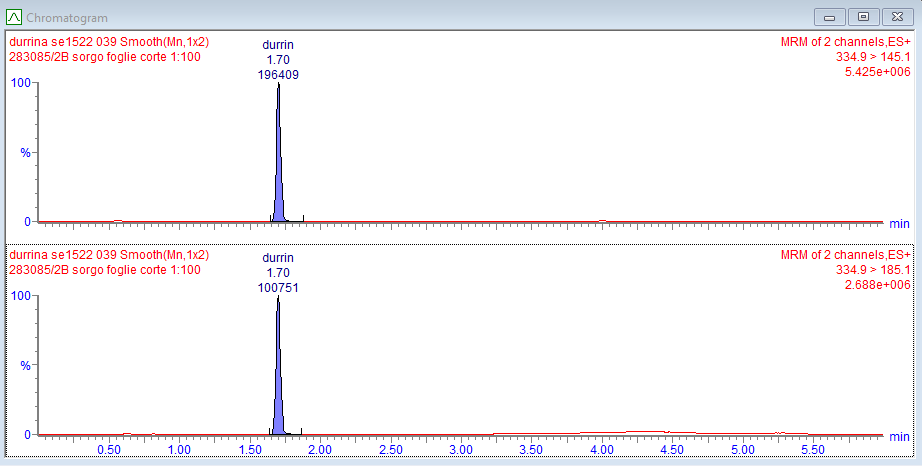
**

**Figure S4.** Daily temperature anomaly in Piedmont during the summer 2022 compared to the period 1991-2020. Black line indicates 2022 temperatures; red areas indicate values above the average of the period 1991-202; blue areas the values below the average. 5- and 95-percentile are shown (dotted lines).


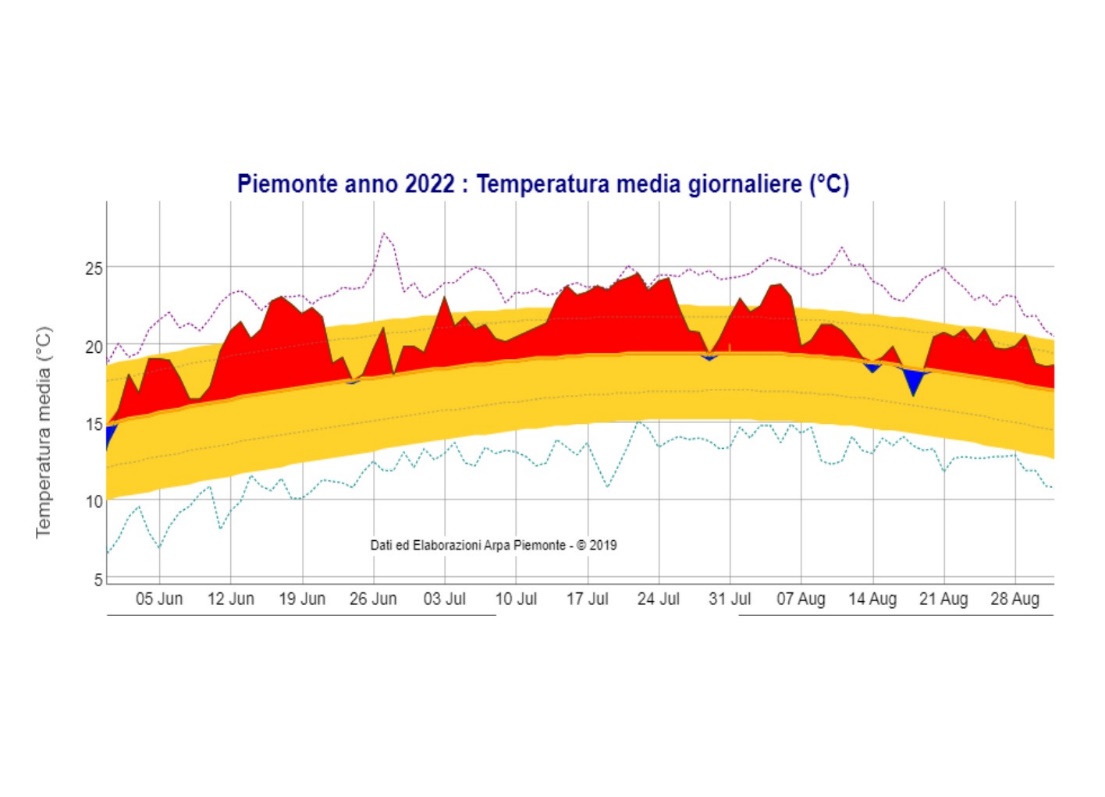


**Figure S5.** Rainfall anomaly (%) in Piedmont basins during summer 2022 compared to the period 1991-2020. Increasing reddish colouring highlights strong anomaly/decrease; increasingly bluish/purplish indicates an increase in rainfall.


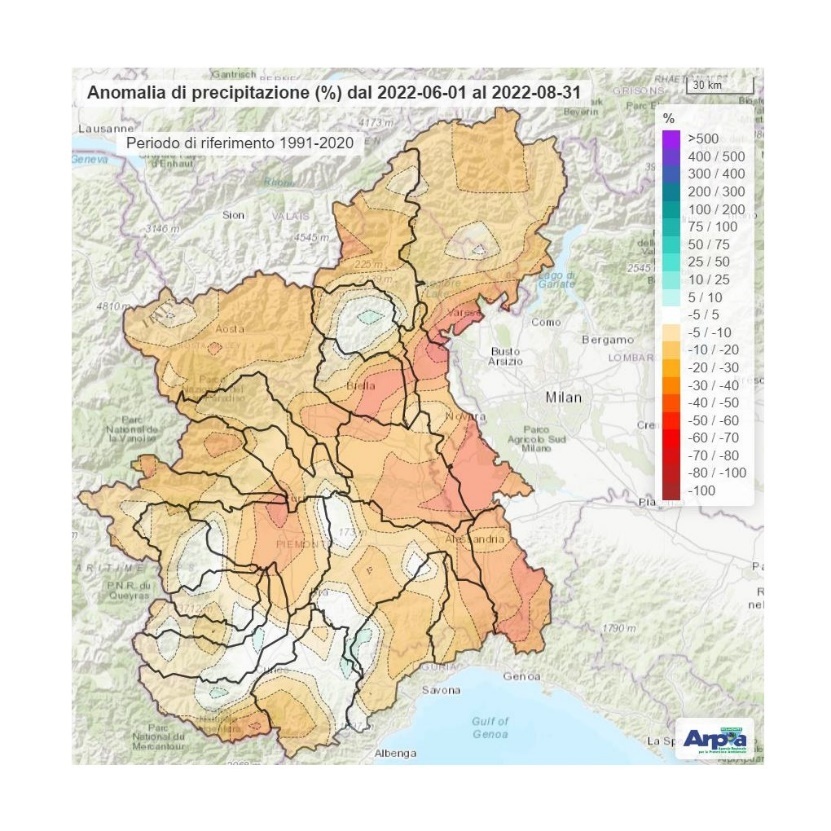


**Figure S6.** Rainfall anomaly (%) in Piedmont basins during September 2022 compared to the period 1991-2020. Increasing reddish colouring highlights strong anomaly/decrease; increasingly bluish/purplish indicates an increase in rainfall.


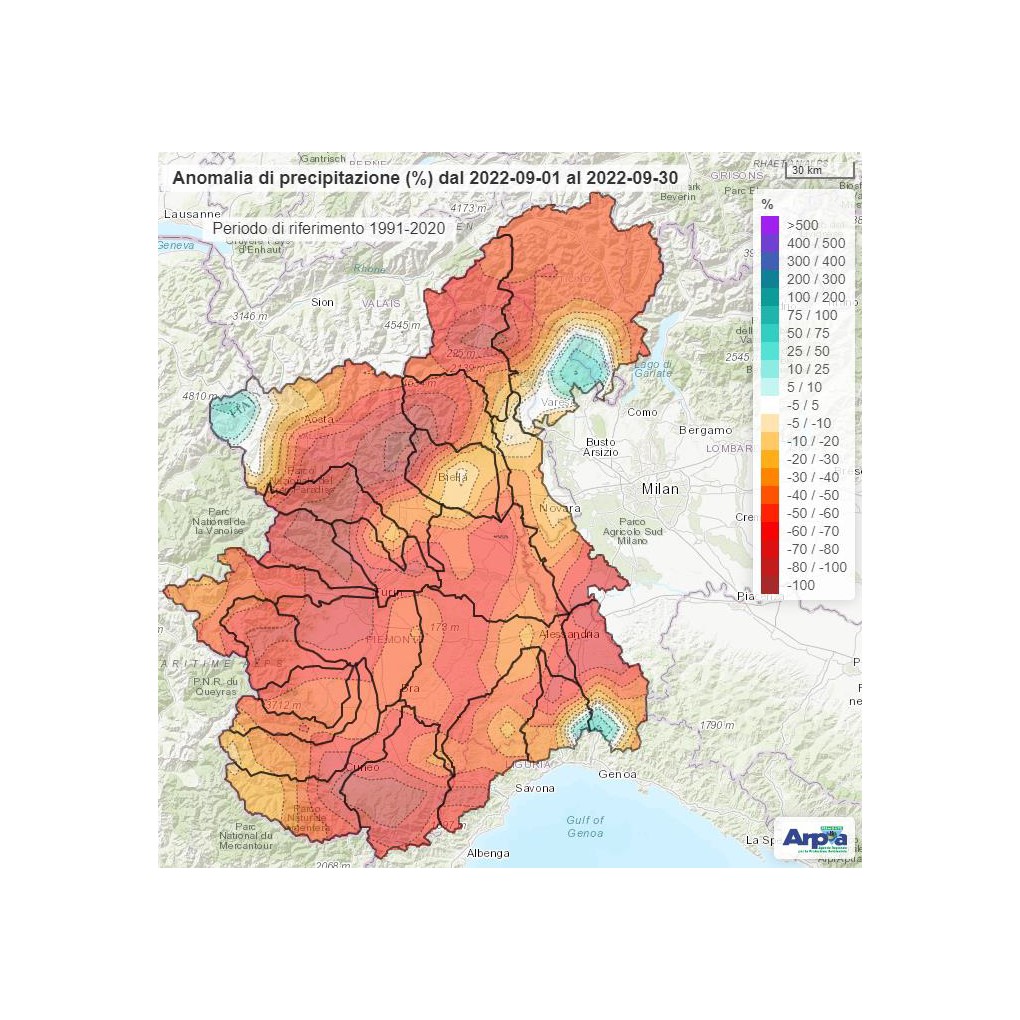


**Figure S7.** Daily hydro-climatic balance (i.e. the difference between rainfall and evapotranspiration expressed in mm) in Piedmont in 2022 compared to the period 1959-2022. Black line: 2022 hydro-climatic balance; green line: average balance of 1959-2022; red dotted line: 5-percentile; purple dotted line: 95-percentile.

**
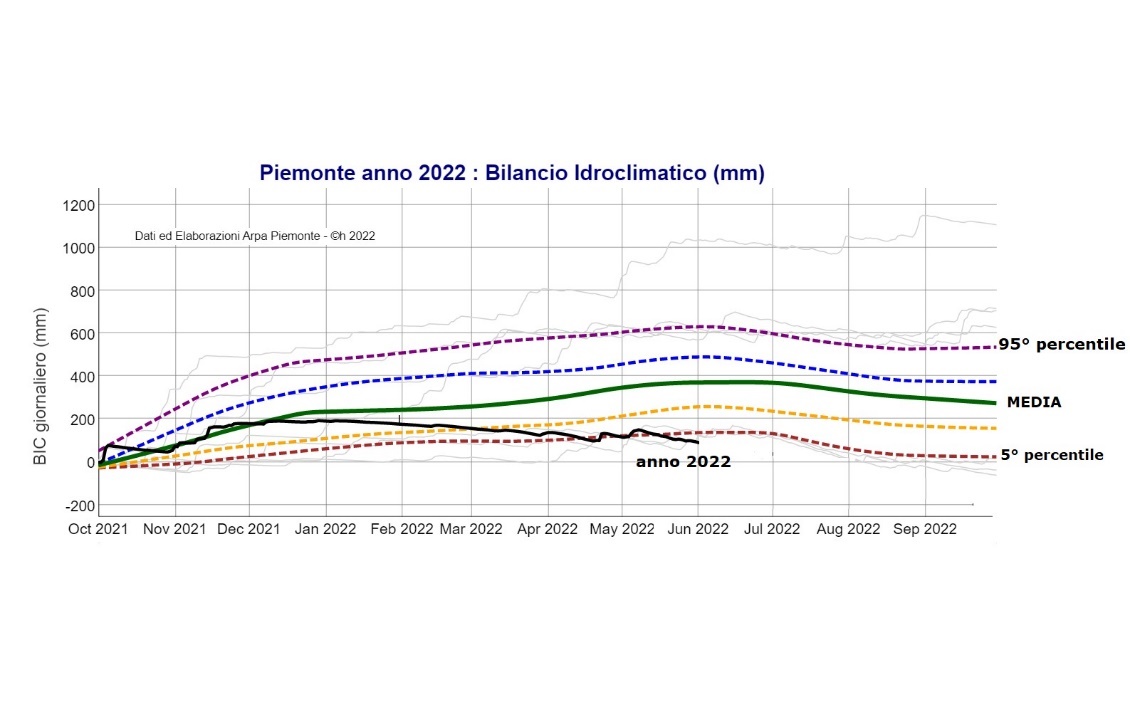
**
